# Supplementary material for: Silicon(iv) complexes of octaaryl-substituted porphyrazines and corrolazines: influence of macrocycle contraction on spectral-luminescence, acid–base, and redox properties
Source: Royal Society of Chemistry journal article supplement (doi:10.1039/d3dt00319a), 2023-01-01
Supplement: d3dt00319a1.pdf [file d3dt00319a1.pdf]

## Supporting Materials for

# Silicon(IV) complexes of octaaryl substituted porphyrazines and corrolazines: Influence of the macrocycle contraction on spectral-luminescence, acid-base and redox properties

Ekaterina D. Rychikhina, Svetlana S. Ivanova, Veronika Novakova, Pavel A. Stuzhin

<sup>a</sup> Research Institute of Macrocyclics, Ivanovo State University of Chemistry and Technology, RF-153000 Ivanovo, Russia.

<sup>b</sup> Faculty of Pharmacy in Hradec Kralove, Charles University, 500 05 Hradec Kralove, Czech Republic

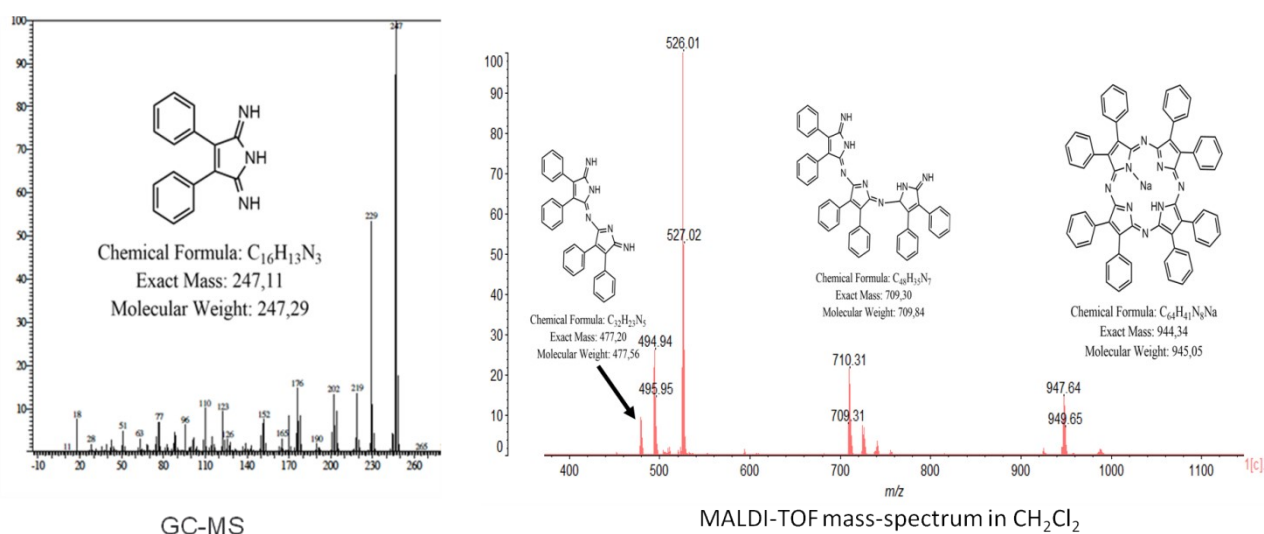

**Figure S1.** Chromato mass spectrum and MALDI TOF mass spectrum of the reaction mixture of diminoimide synthesis, illustrating the formation of its oligomerization.

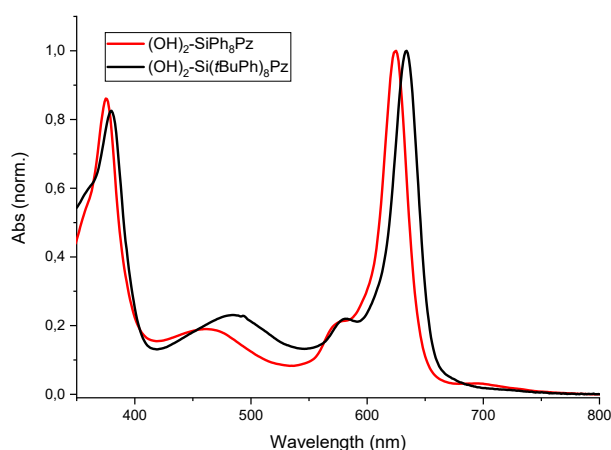

**Figure S2.** UV-vis spectra of the dihydroxy silicon octaarylporphyrazines in CH<sub>2</sub>Cl<sub>2</sub>.

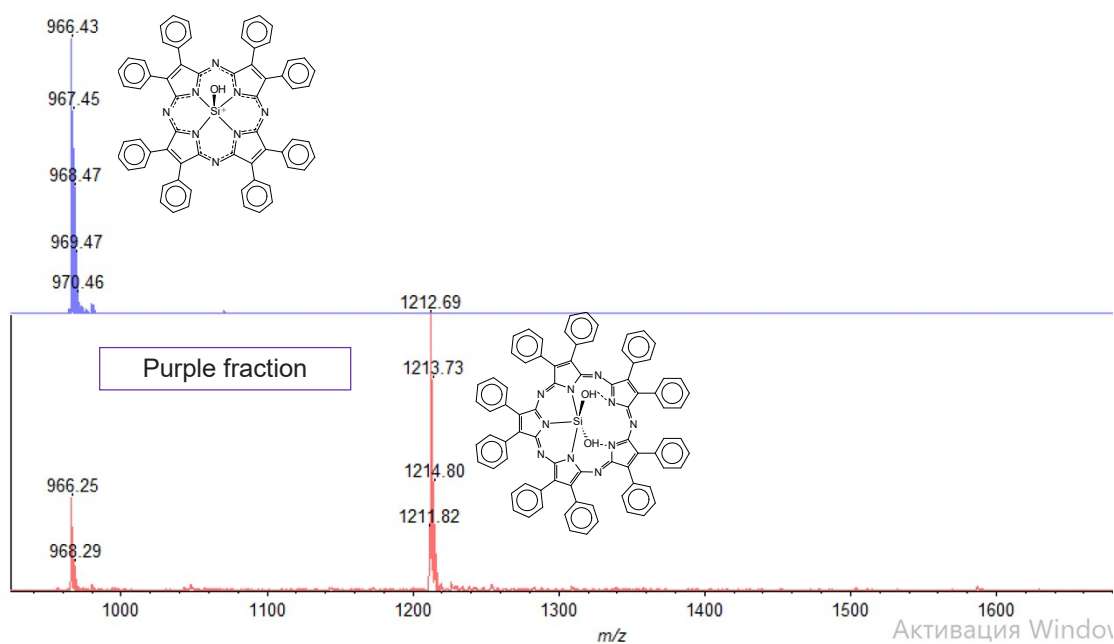

**Figure S3.** The mass spectra of compound **3a** (Si octaphenylporphyrazine) and presumably its pentapyrrolic derivative, contained in the purple fraction.

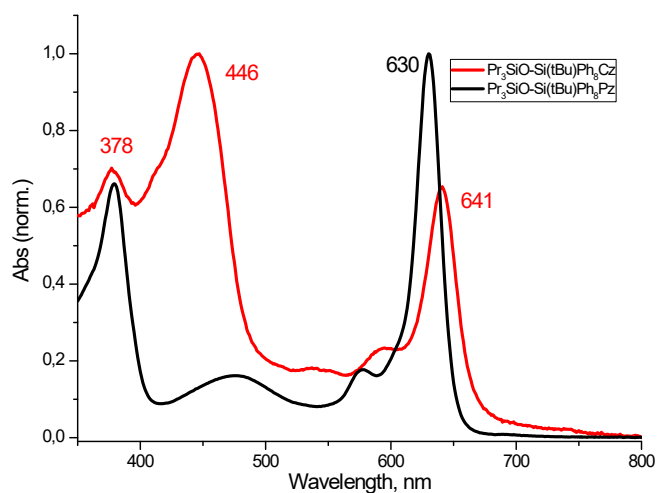

**Figure S4.** The absorption spectra of  $(\text{Pr}_3\text{SiO})\text{SiCz}(\text{tBuPh})_8$  (**5b**) and its porphyrazine precursor  $(\text{Pr}_3\text{SiO})_2\text{SiPz}(\text{tBuPh})_8$  (**4b**) in  $\text{CH}_2\text{Cl}_2$ .

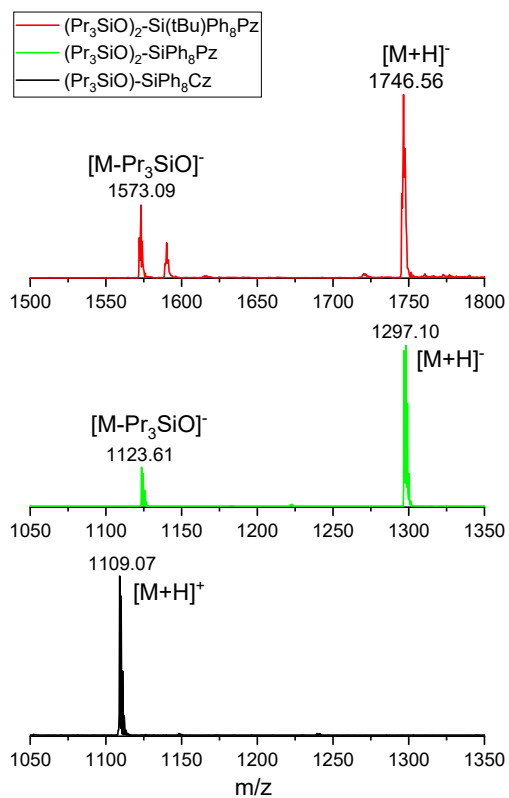

**Figure S5.** MALDI-TOF mass spectra of (Pr<sub>3</sub>SiO)<sub>2</sub>SiPzPh<sub>8</sub> (**4a**) (green line), (Pr<sub>3</sub>SiO)<sub>2</sub>SiPz(*t*BuPh)<sub>8</sub> (**4b**) (red line) and (Pr<sub>3</sub>SiO)SiCzPh<sub>8</sub> (**5a**) (black line).

### IR spectra of the SiPz and SiCz complexes

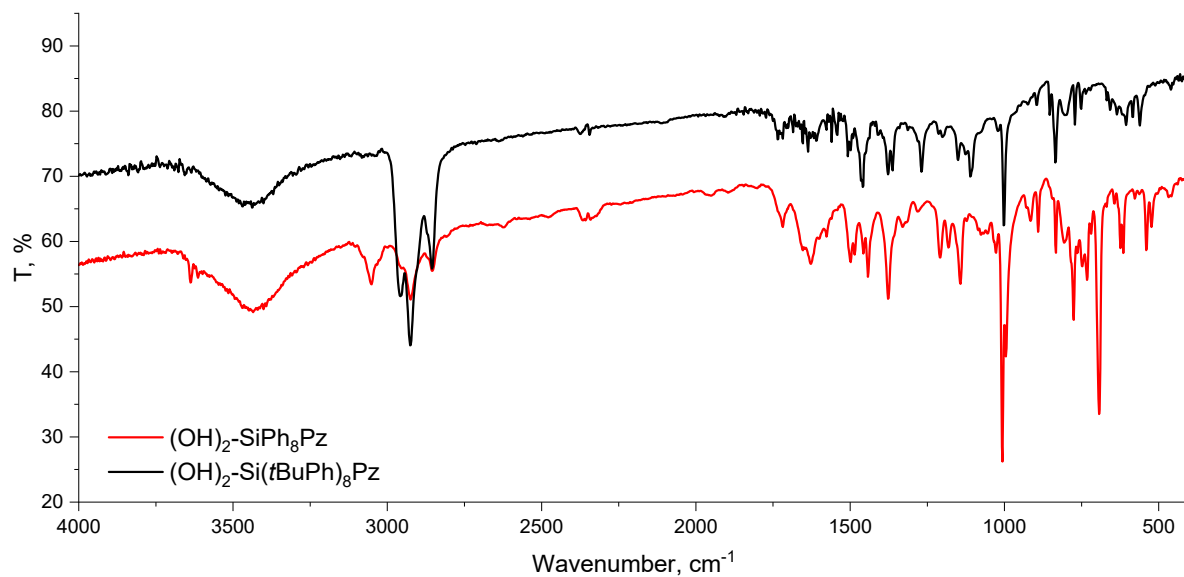

**Figure S6,A.** The IR spectra of the dihydroxy silicon octaarylporphyrazines **3a,b**.

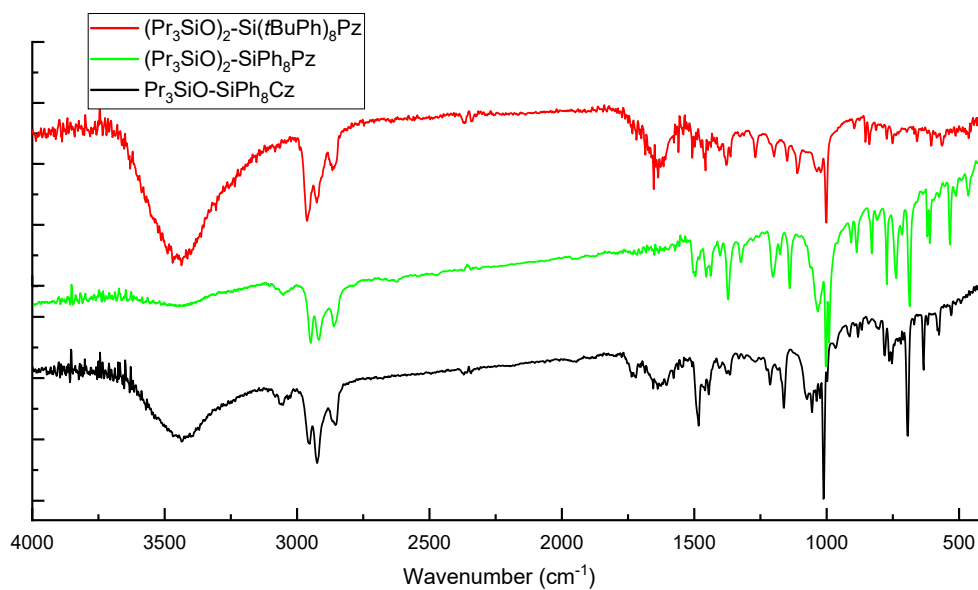

**Figure S6,B.** IR spectra of (Pr<sub>3</sub>SiO)<sub>2</sub>SiPzPh<sub>8</sub> (**4a**) (green line), (Pr<sub>3</sub>SiO)<sub>2</sub>SiPz(*t*BuPh)<sub>8</sub> (**4b**) (red line) and (Pr<sub>3</sub>SiO)SiCzPh<sub>8</sub> (**5a**) (black line) (KBr pellet)

### NMR spectra of the SiPz and SiCz complexes

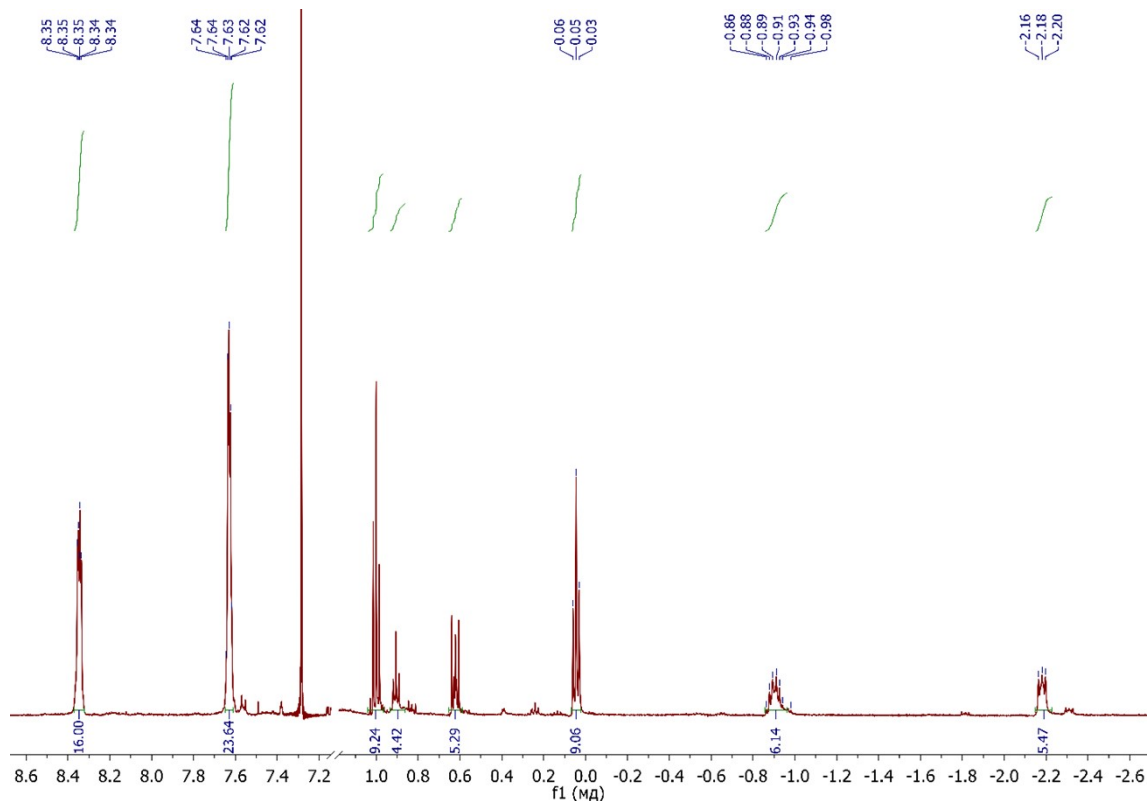

Figure S7.A.  $^1\text{H}$  NMR spectrum of  $(\text{Pr}_3\text{SiO})_2\text{SiPzPh}_8$  (**4a**) in  $\text{CDCl}_3$ .

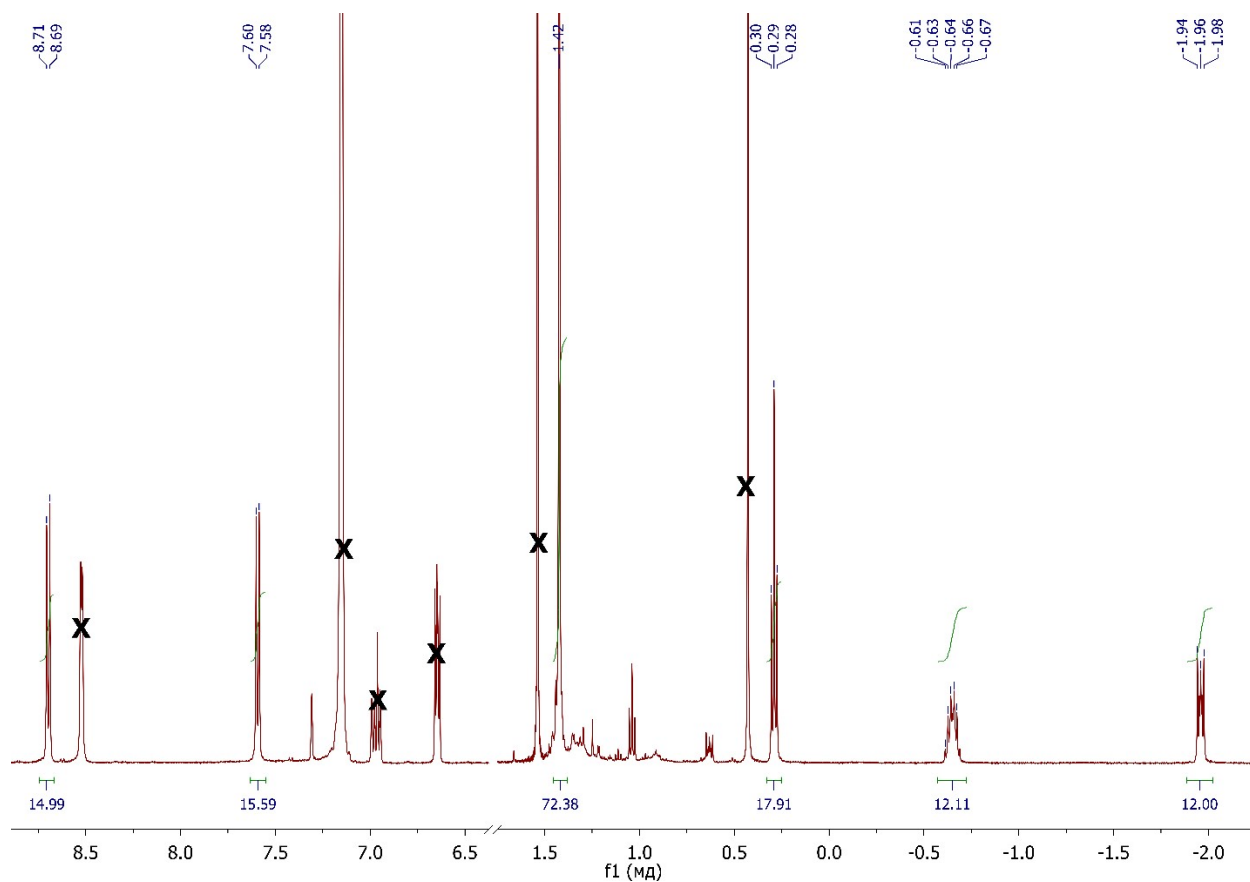

Figure S7.B.  $^1\text{H}$  NMR spectrum of  $(\text{Pr}_3\text{SiO})_2\text{SiPz}(t\text{BuPh})_8$  (**4b**) in  $\text{C}_6\text{D}_6$ .

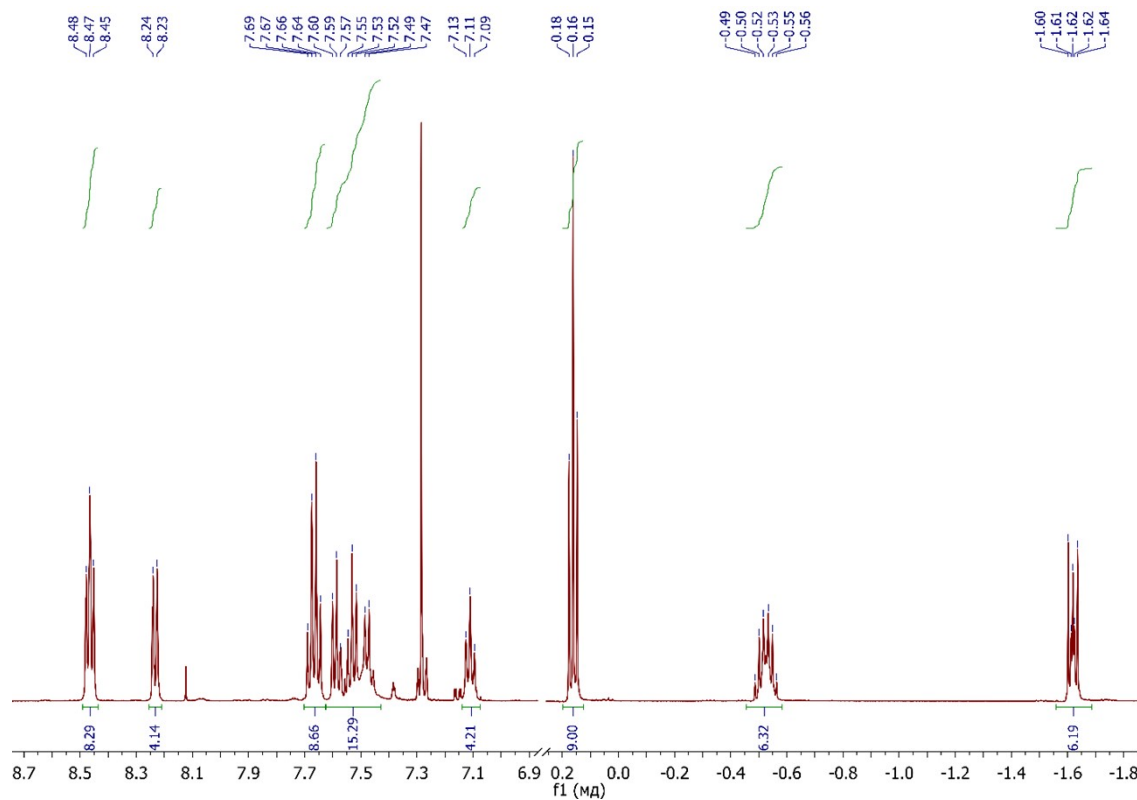

**Figure S7,C.**  $^1\text{H}$  NMR spectrum of  $(\text{Pr}_3\text{SiO})\text{SiCzPh}_8$  (**5a**) in  $\text{CDCl}_3$ .

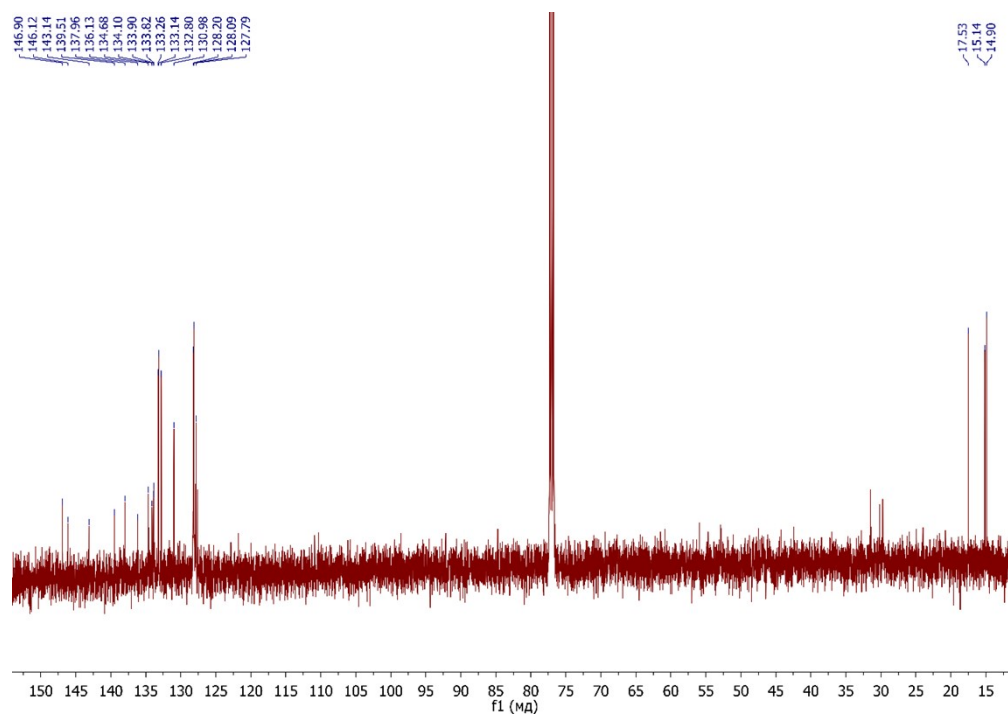

**Figure S7,D.**  $^{13}\text{C}$  NMR spectrum of  $(\text{Pr}_3\text{SiO})\text{SiCzPh}_8$  (**6a**) in  $\text{CDCl}_3$ .

## Photophysical properties of the SiPz and SiCz complexes

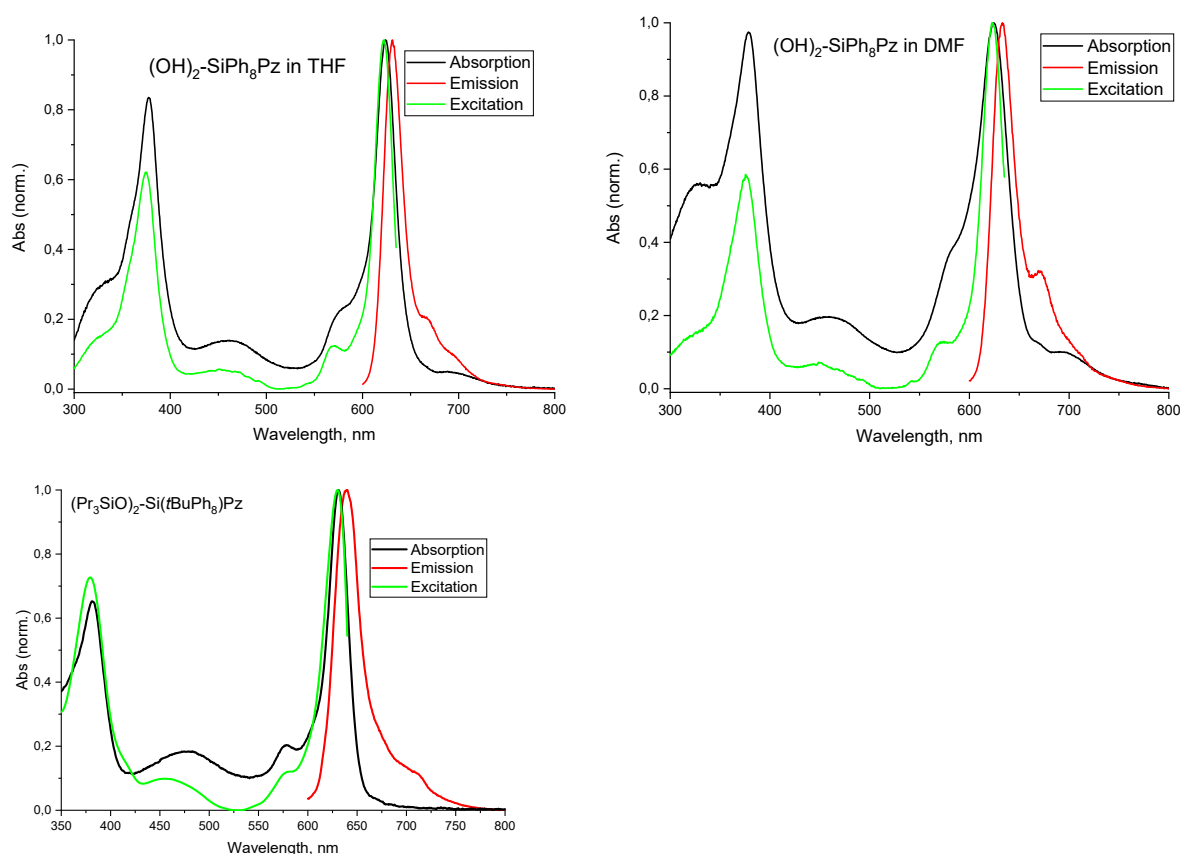

**Figure S8,A.** Absorption (black line), emission (red line) and excitation (green line) of  $(\text{HO})_2\text{SiPzPh}_8$  (**3a**) in THF and DMF, and  $(\text{Pr}_3\text{SiO})_2\text{SiPz}(t\text{BuPh}_8)_8$  (**4b**) in DMF ( $\lambda_{\text{ex}} = 590$  nm,  $\lambda_{\text{em}} = 660$  nm).

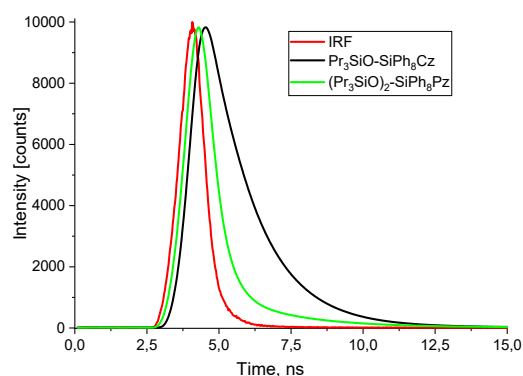

**Figure S8,B.** Fluorescence decay for  $(\text{Pr}_3\text{SiO})_2\text{SiPzPh}_8$  (**4a**) and  $(\text{Pr}_3\text{SiO})\text{SiCzPh}_8$  (**5a**) in DMF. Excitation wavelength  $\lambda_{\text{ex}} = 600$  nm.

## Photochemical properties of the SiPz and SiCz complexes

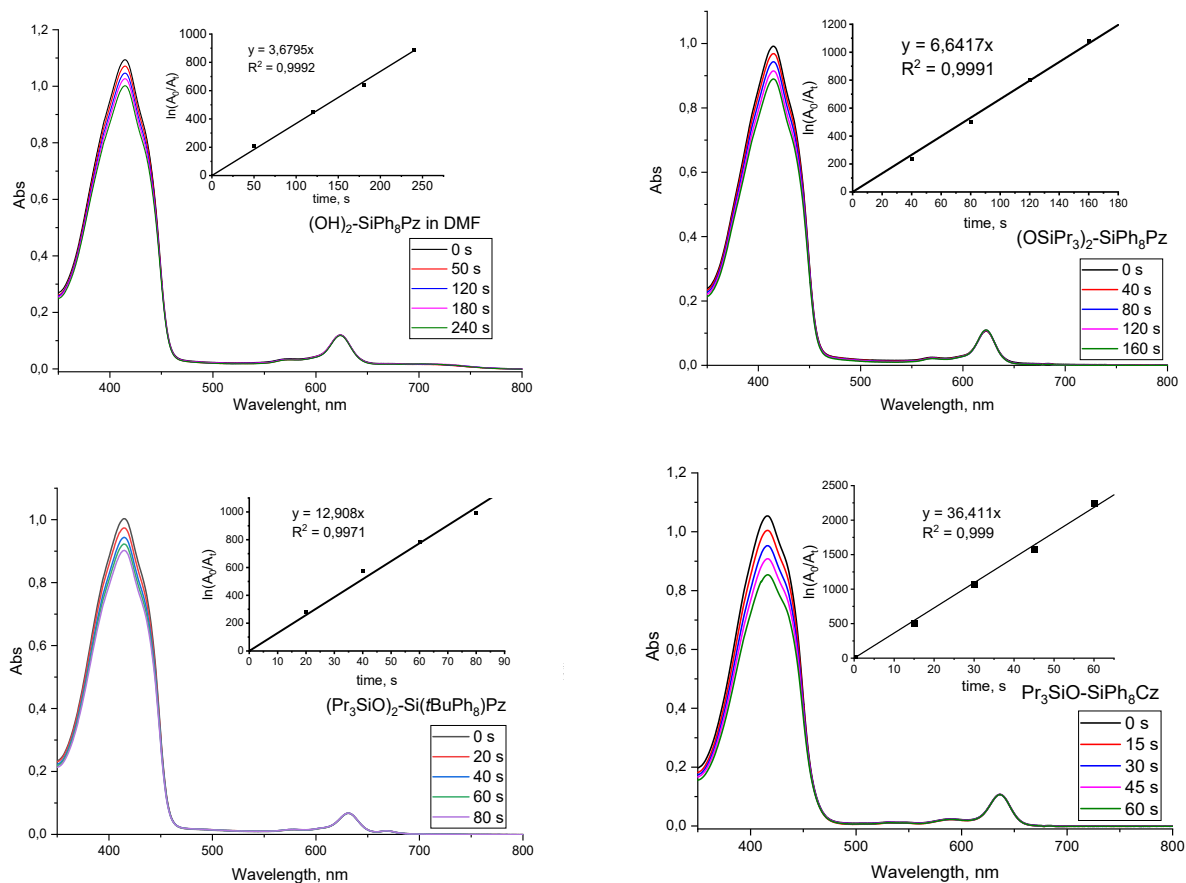

**Figure S9.** The changes of absorption spectra upon irradiation time in air saturated DMF solution containing DPBF and the photosensitizer (Si complex). Insets: logarithmic dependencies of absorbance on irradiation time at 415 nm.



## Electrochemical properties of the SiPz and SiCz complexes

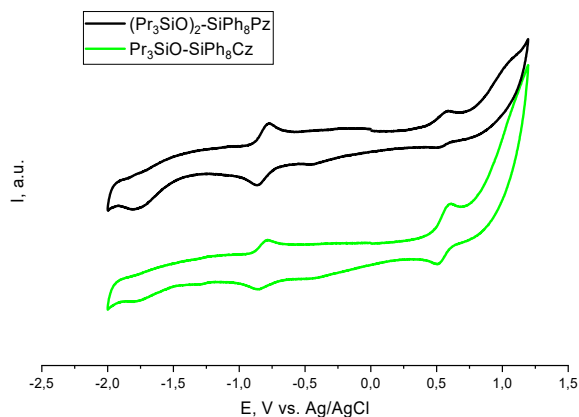

**Figure S10,A.** Cyclic voltamograms of  $(\text{Pr}_3\text{SiO})_2\text{SiPzPh}_8$  (**4a**) (black line) and  $(\text{Pr}_3\text{SiO})\text{SiCzPh}_8$  (**5a**) (green line) in pyridine with ferrocene. Sweep rate was 25 mV/s.

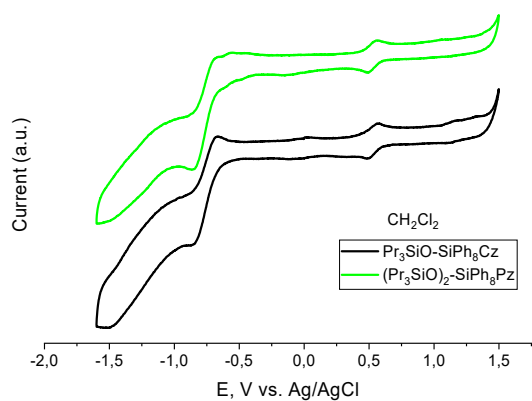

**Figure S10,B.** Cyclic voltamograms of  $(\text{Pr}_3\text{SiO})_2\text{SiPzPh}_8$  (**4a**) (green line) and  $(\text{Pr}_3\text{SiO})\text{SiCzPh}_8$  (**5a**) (black line) in  $\text{CH}_2\text{Cl}_2$  with ferrocene. Sweep rate was 25 mV/s.

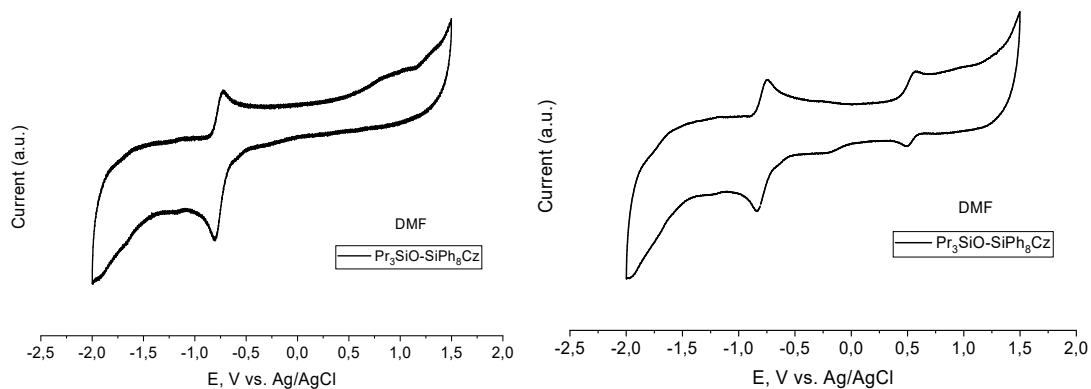

**Figure S10,C.** Cyclic voltamograms of  $(\text{Pr}_3\text{SiO})\text{SiCzPh}_8$  (**5a**) in DMF (left) and in DMF with ferrocene (right). Sweep rate was 25 mV/s.
